# Supplementary material
Source: PubMed Central journal article supplement (PMC2831532)
Supplement: vetres-41-34-s1.pdf [file vetres-41-34-s1.pdf]

## **On line material**

## Supplementary Figures

### Figure S1. Synthetic lipopeptide analogs.

(A) List of abbreviation, structural notation and name of fatty acid residues used in this study.

(B) shows the highly conserved structure of bacterial lipoproteins that is shared by all synthetic lipopeptides used in this study. R1 to R3 indicate fatty acids with R1 representing the amide-bound fatty acid, R2 and R3 representing ester-bound fatty acids. The peptide moiety is indicated by R4. Examples are given at the right.

A)

| Abbreviation | Structural denotation                          | Fatty acids                           |
|--------------|------------------------------------------------|---------------------------------------|
| Hex          | C <sub>6</sub> H <sub>12</sub> O <sub>2</sub>  | Hexanoic acid                         |
| Oct          | C <sub>8</sub> H <sub>16</sub> O <sub>2</sub>  | Octanoic acid                         |
| Pel          | C <sub>9</sub> H <sub>18</sub> O <sub>2</sub>  | Pelargonic/Nonanoic acid              |
| Dec          | C <sub>10</sub> H <sub>20</sub> O <sub>2</sub> | Decanoic acid                         |
| Dod          | C <sub>12</sub> H <sub>24</sub> O <sub>2</sub> | Dodecanoic acid                       |
| Myr          | C <sub>14</sub> H <sub>28</sub> O <sub>2</sub> | Myristic/Tetradecanoic acid           |
| Pam          | C <sub>16</sub> H <sub>32</sub> O <sub>2</sub> | Palmitic/Hexadecanoic acid            |
| Lin          | C <sub>18</sub> H <sub>32</sub> O <sub>2</sub> | Linoleic/ Octadeca-9,12E-dienoic acid |
| Ole          | C <sub>18</sub> H <sub>34</sub> O <sub>2</sub> | Oleic/Octadeca-9E-enoic acid          |

B)

| $  \begin{array}{c}  R^3-O-CH_2 \\    \\  R^2-O-CH \\    \\  CH_2 \\    \\  S \\    \\  CH_2 \\    \\  R^1-N-C-H \\    \quad   \\  H \quad O \\  \quad \quad \quad R^4  \end{array}  $ | Abbreviation                          | R <sup>1</sup> | R <sup>2</sup> | R <sup>3</sup> | R <sup>4</sup> |       |
|----------------------------------------------------------------------------------------------------------------------------------------------------------------------------------------|---------------------------------------|----------------|----------------|----------------|----------------|-------|
|                                                                                                                                                                                        | Pam <sub>3</sub> C-SK <sub>4</sub>    | Pam            | Pam            | Pam            | Pam            | SKKKK |
|                                                                                                                                                                                        | PamOct <sub>2</sub> C-SK <sub>4</sub> | Pam            |                | Oct            | Oct            | SKKKK |
|                                                                                                                                                                                        | MyrPam <sub>2</sub> C-SK <sub>4</sub> | Myr            |                | Pam            | Pam            | SKKKK |
|                                                                                                                                                                                        | Pam <sub>2</sub> C-SK <sub>4</sub>    |                |                | Pam            | Pam            | SKKKK |

**Figure S2. Expression of TLR1, TLR2 and TLR6 in HEK293 cells.**

cDNA from HEK293 cells was analyzed for the expression of TLR1, TLR2, TLR6 and the housekeeping gene GAPDH. TLR1 and TLR6 are expressed, while TLR2 could not be detected.

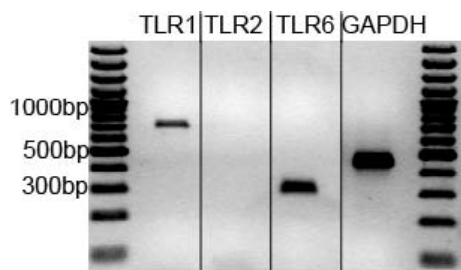

**Figure S3. Multiple nucleotide sequence alignment of N-terminus of short and long transcript of boTLR1, huTLR1 and muTLR1.**

Sequences for short boTLR1, huTLR1 and muTLR1 were obtained from NCBI GenBank.

Sequence of long form of boTLR1 (boTLR1-fl, full length) starts with an ATG that was found 195 base pairs upstream from the start codon of boTLR1-s. Alignment was performed with ClustalW method. Pattern highlights not identical nucleotides.

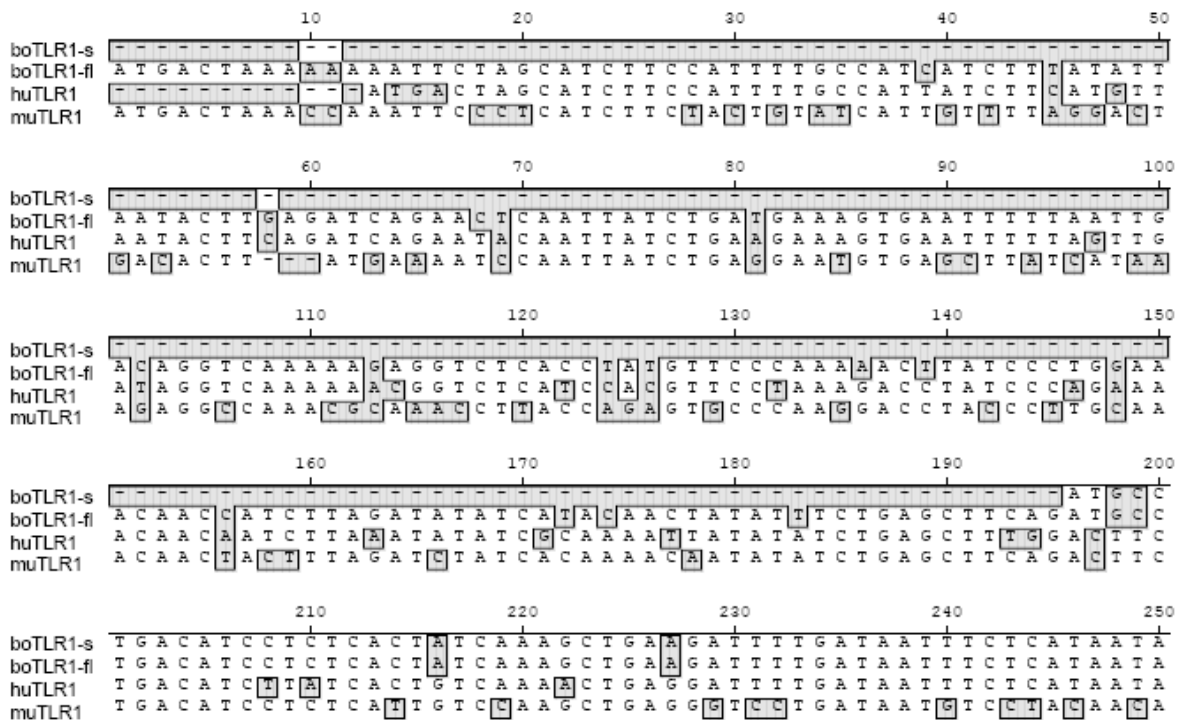

**Figure S4. Sequence of full length TLR1.**

(A) Nucleotide sequence with ATG of short boTLR1 marked (B) Protein sequence with methionine of short boTLR1 marked.

**A)**

```

1   A T G A C T A A A A A A A A A T T C T A G C A T C T T C C A T T T T G C C A T C A T C T T T A T A T T
51  A A T A C T T G A G A T C A G A A C T C A A T T A T C T G A T G A A A G T G A A T T T T A A I T G
101 A C A G G T C A A A A A G A G G T C T C A C C T A T G T T C C C A A A A A C T T A T C C C T G G A A
151 A C A A C C A T C T T A G A T A T A T C A T A C A A C T A T A T T T C T G A G C T T C A G A T G C C
201 T G A C A T C C T C T C A C T A T C A A A G C T G A A G A T T T T G A T A A T T T C T C A T A A T A
251 G A A T C C A G T A T C T T G A C T T G A G T G T T T T T A A A T T C A A C C A G G A A C T G G A A
301 T A C T T G G G A T T T G T C C C A C A A C A A T T T T G G A G A A G A T T T C T T G C C A C C C T A C
351 T C T G A A C C C T C A A G C A C T T A G A C C C T C A T T T A A T C C A T T T G A T G C C C T G C
401 C C A T A T G C C A A G A G T T T G G C A C A C A T G T C T C A A C T A G A A T T T C T G G G G T T G
451 A G T G C C A C A C A G T T A C A A A T C C A A T G T G C A G T C A A T C A C T C A T T T T G C A
501 C A T C A G G A A A G T T T T A T T G G T C T T A G G A G A T A C T T A T G G G G A A A G A G A A G
551 A T G C C G A G A G C C T T C A A G A G C C T T A A G A C A C A G A G T C T G C A C A T T G T T T C
601 C C C A C A G G G A A A G G G A A T T C C A T T T T A T T T T G G A C C G T G T C A G T C G G C A C C A C
651 A G T G A G T C T G G A A C T G T C T A A T A T C A A A T G T G T G C T T G A T G A T A A T G G G T
701 T C T T C C A C A A G G T T A T G T C T A T A A A A T A T T G T C A A A T A T G A A C A T C C A G G T T A
751 T C A A A T C T T A C T T T A A A C A A A C A T T G A A A T A A C T T G G A A T T C C T T C T T C A C
801 G A T C T C C A G T T G G T T T G G C G T A C A A A C A T T G A G T A C T T C T C C A T T T T C A A
851 A T G T G A A A C T A C A A G G T T A C C T T G A C T C T A G A G A T T T T G A T T A T T C T G A C
901 A C T T C A C T G A A G G C C T T G T C T A T A C A C A A A G T T G T C C A T G A T G T G T T C A G
951 T C T T C C A C A A G G T T A T G T C T A T A A A A T A T T G T C A A A T A T G A A C A T C C A G C
1001 A T C T C A C A G T G T C T G C T G C A C A C A T G G T C C A C A T G G T C T G C C C A T C C C C A A
1051 A T T A G C C C A T T T C T G T A T T T G A A T T T T T C C A A T A A T C T C T T A A C A G A C A C
1101 A G T T T T C A T A A A C T G T A C A A A T T T G G C T A A A T T T G A A G A C A C T T A T C C T A C
1151 A A A A G A A T C A G T T A A A A G A A A C T T G T A A A C A T A G T T C A T A T G A C C C A G G G A A
1201 A T G A A G T C T C T A C A A C A A C T G G A T G T T A G C C A G A A T T C C C T G A T G T A T G A
1251 T G A A A G T G A A G G A A A T T G C C C T T G G G C C A G A A A T T T A T T A A G T T T A A A T A
1301 T G T C T T C A A A T A T A C T T A C T G A C T C T G T T T T C A G A T G T T T A C C T C C C T C A G
1351 A T C A A G G T T C T T G A T C T T C A C A A A T A A C A G A A T A A G G A G C A T C C C T A A A G A
1401 T G T C A C T G G T C T T A G A A A C T T T G C A A G A A C T C A A C C T T G C T T C C A A T T G C T T
1451 T A G C C C A C C T T C C T G G A T G T G G T A T C T T T A G C A G C C T T T C C A T T C T G A T C
1501 A T T G A C T A T A A C T C A A T T T C C A A T C C C A T C A G C T G A T T T C T T C C A G A G C T G
1551 C C A G A A G A T T A G G T C C C T C A A A G C G G G A A C A A T C C A T T C C A A T G T T C C T
1601 G T G A G C T A A A G A G A C T T C A T C C A A A G T A T A G G C C A A G T A T C A A G T G A C G T G
1651 T A G A G G G G C T G G C C T G A G T C T T A T A A G T G T G A C T A T C C G G G A A A G C T A C A C A
1701 G G G A A C C C C T C T A A A A G G A C T T C C A G G T A T C T G A G C T A T C C T G A A C A C A C A G
1751 C T C T G C T G A T C G T C A C C A T T G T G G T C C C T G G G C T G G T G C T G G C T G T T G C T
1801 G T G A C T G T C C T C T G T A T C T A C C T G G A T C T G C C C T G G T A C C T C A G G A T G G T
1851 G T G T C A G T G G A C C C A G A C C C G G C G C A G G G C C A G G A A T G T A C C C T T G G A A G
1901 A A C T C C A A A G A A C T C T C A A G T T C C A T T G C T T T T A T T T C A T A T A G T G G G C A C
1951 G A T T C T G C C T G G G T G A A G A A T G A A T T A A T A C C T A A C C T A G A A A A A G A A G A
2001 T A T A A G A A A T T T G T C T C C A T G A G A G A A A C T T T G T T G C T G G C A A G A G C A T T G
2051 T G G A A A A A T A T C A T C A A C T G C A T T G A G A A A A G T T A C A A A T C C A T C T T T G T C
2101 T T G T C T C C C A C A C T T T G T C C A G A G C G A A T G G T G C C A T T A T G A A C T C T A C T
2151 T G C C C A C C A C A A T T C T T C C A T G A A A G G A T C T G A T A A C T T A A T C C T G A T C T
2201 T G C T G G A A T C C A A T T C C A C A G T A T T C C A T T C C T A G C A G C T A C C A C A A G C T A
2251 A G A G C T C T C A T G G C A C A G A G A C T T A T T T G G A A T G G C C C A A G G A G A A G A G
2301 T A A A C A C G G A C T T T T T T G G G C T A A C C T A A G A G C A T C C A T T A A T A T T A A A C
2351 T G A T G G A A A A A G C A G C A G A A A T A C A T T A A
    
```

**B)**

```

1   M T R K N S S I F H F A I I F I L I L E I R T Q L S D E S E F L I D R S R R G L T Y V P K N L S L E
51  T T I L D I S Y N Y I S E L Q P P D I L S L S K L K I L I I S H N R I Q Y L D L S V F K F N Q E L E
101 Y L D L S H N N L E K I S C H P T L N L K H L D L S F N P F D A L P I C Q E F G N M S Q L E F L G L
151 S A T Q L Q K S S V Q S I T H L H I S K V L L V L G D T Y G E R E D A E S L Q D L K T Q S L H I V F
201 P T G K E F H F I L D V S V G T T V S L E L S N I K C V L D D N G C P Y F E N V L S K L Q R N S R L
251 S N L T L N N I E I T W N S F P T I L Q L V W R T N I E Y P S I S N V K L Q G Y L D S R D F D Y S D
301 T S L K A L S I H K V V H D V F S L P Q G Y V Y K I L S N M N I Q H L T V S A A H M V H M V C P S Q
351 I S P F L Y L N F S N N L L T D T V F I N C T N L A N L K T L I L Q K N Q L K E L V N I V H M T Q E
401 M K S L Q L L D V S Q N S L M Y D E S E G N C F W A R N L L S L N M S S N I L T D S V F R C L P P Q
451 I K V L D L H N N R I R S I P K D V T G L E T L Q E L N L A S N S L A H L P G C G I F S S L S I L I
501 I D Y N S I S N P S A D F F Q S C Q R I R S L K A G N N P F Q C S C E L R D F I Q S I G Q V S S D V
551 V E G W P E S Y K C D Y P E S Y K G T P L K D F Q V S E L S C N T A L L I V T I V P P G L V L A V A
601 V T V L C I Y L D L P W Y L R M V C Q W T Q T R R R R A R N V P L E E L Q R T L Q F H A F I S Y S G H
651 D S A W V K N E L I P N L E K E D I R I C L H E R N F V A G K S I V E N I I N C I E K S Y K S I F V
701 L S P N F V Q S E W C H Y E L Y F A H H N L F H E G S D N L I L I L L D P I P Q Y S I P S S Y H K L
751 R A L M A Q R T Y L E W P K E K S K H G L F W A N L R A S I N I K L M E K A A E I H
    
```
